# Supplementary material for: Social Work Staffing and Use of Palliative Care Among Recently Hospitalized Veterans
Source: PubMed Central journal article supplement (PMC9856777; doi:10.1001/jamanetworkopen.2022.49731), 2023-01-04

## Supplemental Online Content

Cornell PY, Halladay CW, Montano AR, et al. Social work staffing and use of palliative care among recently hospitalized veterans. *JAMA Netw Open*. 2023;6(1):e2249731. doi:10.1001/jamanetworkopen.2022.49731

### **eAppendix.** Supplementary Methods

**eTable 1.** Intervention Sites, Starting Month, and Facility Characteristics

**eTable 2.** Descriptive Table of Variables Used Subsequent Models and Other Demographics of Interest

**eTable 3.** Characteristics of Hospitalized Veterans Before and After Intervention

**eTable 4.** Sensitivity Analyses: Program Outcome Using Different Estimators

**eTable 5.** Effects Grouped by Sites That Started the Staffing Program in the Same Month

**eTable 6.** Falsification Tests Using Inpatient Consults and Mortality as Outcomes

**eFigure.** Event Study and Evaluation of Parallel Trends

This supplemental material has been provided by the authors to give readers additional information about their work.

## **eAppendix.** Supplementary Methods

### ***Data and measures***

#### *Sample and setting*

eTable 1 lists the VA sites that began the staffing program in our study period. Of the 71 sites, 40 (75%) were community-based outpatient clinics (CBOCs) or multi-specialty CBOCs, 10 (14%) were located at a VA medical center (hospital), and 8 (10%) were other outpatient services facilities or health care centers. Veterans can access some palliative services from their primary care clinician or VA-paid community hospice and palliative services, and all VA medical centers have specialty inpatient palliative services on site.

We assigned Veterans to a site based on where they had the most primary care encounters in a fiscal year. Each Veteran's baseline characteristics and outcomes are measured from an index date in the calendar month. If a Veteran had a primary care encounter in that month, the first primary care encounter is the index date; if they did not have a primary care encounter, their index date is assigned to the 15th of the month. For this analysis, we included Veterans who had any inpatient hospital (VA or community) care within the 30 days prior to the index date.

#### *Outcome*

The palliative care outcome includes encounters with the VA “stop” codes 351 or 353 in the first or second position; and inpatient specialty codes (“bed section codes”) 96 and 1F. These codes are used interchangeably by providers for hospice and palliative care. In billing records, we identified community-provided services with the following “hospice/palliative care” purpose-of-visit codes: 77, 78, 43, 37, and 38.

VA policy mandates that specialty care occurs within 28 days of the order; so, if an order for outpatient care is placed at discharge, we would expect to meet the 30-day mark because of scheduling mandates. Alternatively, we suppose that Veterans would have a transition nurse phone call within 2 days of discharge; a follow-up PACT appointment, if needed, would be scheduled within two weeks; and if needs are identified at that appointment, another 2 weeks for referral and palliative care services to be delivered. Thus we deemed 30 days a reasonable interval to accommodate clinical variation and capture most palliative care services set in motion by transitions in care.

#### *Exposure*

Exposure to the program is measured by the month at the site level. The intervention date is the first month in which a social worker is hired to a program-funded position. Some sites received funding for multiple full-time-equivalent positions, and some individuals covered multiple smaller clinics in their position. We excluded sites' data for the first and second month of the new social work position to allow for a training period.

### ***Estimation strategies***

#### *Two-way fixed effects*

The standard approach to estimating an intervention effect with variation in treatment timing is the two-way fixed-effects (TWFE) linear regression. This is a linear regression as follows:

$$Y_{it} = \alpha D_{st} + \theta_t + \eta_s + \gamma X_{ist} + v_{ist}$$

where  $\theta_t$  is a year-month fixed effect,  $\eta_s$  is fixed effect for sites (i.e., primary care clinic or community-based outpatient clinic),  $D_{st}$  is a dummy variable representing participation in the program at time t,  $X_{ist}$  are individual Veteran characteristics,  $v_{ist}$  are time varying unobservable variables that are mean independent of everything else, and  $\alpha$  is the effect of the staffing intervention. This approach is a standard in applied work and historically was considered a strong quasi-experimental design because  $\eta_s$  controls for systematic differences between Veterans at sites that are consistent over time and  $\theta_t$  controls for secular changes over time. In our sample, all sites eventually participate in the program. Therefore, in our TWFE estimators newly treated sites are compared to “not yet treated” sites and “already treated” sites. It requires some key assumptions, including that 1) there are no exogenous events other than the program that affect the outcome and coincide with the treatment intervention, and 2) the trends in outcome for treatment and comparison groups would be similar, or parallel, in the absence of the intervention. In this study, the staggered timing of the program start dates decrease the likelihood of a time-varying confounder that coincided with the intervention. We address the second parallel trends assumption by examining pre-trends in the outcome (see below).

#### *Difference-in-difference: alternative estimators*

Recent work has shown that the traditional TWFE estimators can result in hard-to-interpret weights and even negative weights for some units because of dynamic treatment effects.<sup>1</sup> To address this problem, we also estimate our program impact using Sant’Anna and Callaway’s approach with group-time-average treatment effects. Sites are grouped by the month when they started the staffing program. The effect of the program is estimated for each group, using the not-yet-treated sites as the comparison sample. We report the aggregated group-time-averaged effects: the program effect is calculated for each group of clinics that began the intervention at the same time, and these effects are then weighted by the size of the groups.

#### *Sensitivity analyses and checks*

##### *Parallel trends assumption*

We created an event study plot using the DID package to examine trends in the outcome relative to the comparison in the months leading up to treatment (figure S1). The pre-treatment dummy coefficients are statistically not different from zero, and suggest that prior to the intervention the trend in palliative care may, if anything, trend downward relative to the trend of the comparison sites.

##### *Collider bias: sample selection after the social work staffing intervention*

Previous work has shown that the VA Social Work Staffing Program may decrease the risk of hospitalization for high-risk Veterans, which could lead to “collider bias” because the intervention could be associated with selection into the sample in ways that are systematically correlated with use of palliative care.<sup>2</sup> While we cannot entirely rule out possible collider bias, we show that the characteristics of Veterans hospitalized in the month before and two months after the intervention are substantially similar (**Error! Reference source not found.**). Because our study cohort is an unbalanced panel, the table shows only hospitalizations in the month before and the third month after the intervention. The table shows only very small differences between the groups for the demographics and comorbidities in our sample, with all SMD<0.05 (a

conservative rule of thumb for covariate balance is that variables have  $SMD < 0.1$ ). Although this check does not rule out the possibility that selection on unmeasured characteristics could bias selection into hospitalization, it is suggestive that systematic differences before and after intervention in the characteristics of hospitalized Veterans are unlikely.

Nonetheless, it is useful to explore the likely extent and direction of collider bias from previous work. In previous work, we found that the social work program intervention was associated with a decrease of approximately 4% decrease in hospitalizations among high-risk Veterans, and no significant effect among the population at large. If those “averted” hospitalizations were among Veterans that would have had low or no palliative care use, the sample difference in the denominator could bias our estimate of the program’s effect on palliative care in the positive direction. In a back-of-the-envelope example, suppose we have a group of 1000 hospitalized Veterans, 14.5 who use palliative care, prior to program intervention. After the social work intervention, this group would be reduced by 4.4%, so the new denominator is =956. In the absence of any true program effect on palliative care use, the new rate is  $14.5/956 = 15.2$ . This example puts an upper bound of 0.7 Veterans per 1000 that we are over-estimating due to collider bias. Because the lower bound of the 95% confidence intervals were  $>2$  per 1000 for the overall sample, even accounting for this bias we would still see an impact of the social work program on primary care.

*Competing risk: Check for change in 30-day mortality associated with the social work program*  
Increased survival and time at risk could explain an increase in palliative care referrals. We checked for a change in mortality associated with the social work staffing intervention (**Error! Reference source not found.**). We found small and not statistically significant associations of the intervention with 30-day mortality, suggesting that our results were unlikely to be driven by changes in survival.

*Falsification test with palliative care inpatient consults*  
Because it is possible that other changes in health system delivery that were correlated over time with the staffing intervention may have influenced use of palliative care, we investigated the association of inpatient palliative care consults with the intervention (**Error! Reference source not found.**). We identified consults through orders in the health record with associated stop codes of 351 or 353.

## Supplement References

1. Callaway B, Sant’Anna PHC. Difference-in-Differences with multiple time periods. *Journal of Econometrics*. 2021;225(2):200–30.
2. Griffith GJ, Morris TT, Tudball MJ, Herbert A, Mancano G, Pike L, et al. Collider bias undermines our understanding of COVID-19 disease risk and severity. *Nature communications*. 2020;11(1):1-12.

**eTable 1.** Intervention Sites, Starting Month, and Facility Characteristics

| Station ID | Division Name                  | First Treat Mnth | State | ZIP3 | VISN | Type   | Provider based |
|------------|--------------------------------|------------------|-------|------|------|--------|----------------|
| 517GB      | GREENBRIER CBOC                | 2016-11          | WV    | 249  | 5    | CBOC   | PBO            |
| 517QA      | PRINCETON VA CLINIC            | 2016-11          | WV    | 247  | 5    | OOS    | PBO            |
| 519GA      | ODESSA CBOC                    | 2016-11          | TX    | 797  | 17   | MSCBOC | PBO            |
| 519GB      | HOBBS                          | 2016-11          | NM    | 882  | 17   | CBOC   | PBO            |
| 519GD      | FT STOCKTON                    | 2016-11          | TX    | 797  | 17   | OOS    | PBO            |
| 541GJ      | NEW PHILADELPHIA               | 2016-11          | OH    | 446  | 10   | MSCBOC | PBO            |
| 517        | BECKLEY VAMC                   | 2017-01          | WV    | 258  | 5    | VAMC   | PBH            |
| 528G9      | CORTLAND CBOC                  | 2017-01          | NY    | 130  | 2    | CBOC   | PBO            |
| 528GM      | ROME,NY                        | 2017-01          | NY    | 134  | 2    | MSCBOC | PBO            |
| 528GN      | BINGHAMTON,NY                  | 2017-01          | NY    | 139  | 2    | MSCBOC | PBO            |
| 589A6      | LEAVENWORTH VAMC DIVISION      | 2017-01          | KS    | 660  | 15   | VAMC   | PBH            |
| 657GK      | MT. VERNON CBOC-MA             | 2017-01          | IL    | 628  | 15   | CBOC   | PBO            |
| 657GU      | HARRISBURG CBOC-MA             | 2017-01          | IL    | 629  | 15   | CBOC   | PBO            |
| 528A7      | SYRACUSE,NY                    | 2017-02          | NY    | 132  | 2    | VAMC   | PBH            |
| 528G5      | AUBURN CBOC                    | 2017-02          | NY    | 130  | 2    | CBOC   | PBO            |
| 528GO      | WATERTOWN CBOC                 | 2017-02          | NY    | 136  | 2    | MSCBOC | PBO            |
| 528GP      | OSWEGO,NY                      | 2017-02          | NY    | 131  | 2    | CBOC   | PBO            |
| 541GC      | SANDUSKY                       | 2017-02          | OH    | 448  | 10   | MSCBOC | PBO            |
| 549BY      | FORT WORTH OPC                 | 2017-02          | TX    | 761  | 17   | MSCBOC | PBO            |
| 549GE      | BRIDGEPORT VA CLINIC           | 2017-02          | TX    | 762  | 17   | CBOC   | PBO            |
| 589A5      | TOPEKA VAMC DIVISION           | 2017-02          | KS    | 666  | 15   | VAMC   | PBH            |
| 610A4      | FORT WAYNE, IN DIVISION        | 2017-02          | IN    | 468  | 10   | VAMC   | PBH            |
| 610GC      | GOSHEN CBOC                    | 2017-02          | IN    | 465  | 10   | CBOC   | NPB            |
| 657GM      | EFFINGHAM CBOC-MA              | 2017-02          | IL    | 624  | 15   | CBOC   | PBO            |
| 436        | FT HARRISON MT                 | 2017-03          | MT    | 596  | 19   | VAMC   | PBH            |
| 528G3      | BAINBRIDGE CBOC                | 2017-03          | NY    | 137  | 2    | CBOC   | PBO            |
| 528G6      | FONDA CBOC                     | 2017-03          | NY    | 120  | 2    | CBOC   | PBO            |
| 528G7      | CATSKILL CBOC                  | 2017-03          | NY    | 124  | 2    | CBOC   | PBO            |
| 541GH      | EAST LIVERPOOL                 | 2017-03          | OH    | 439  | 10   | MSCBOC | PBO            |
| 549A4      | BONHAM                         | 2017-03          | TX    | 754  | 17   | DOM    | PBH            |
| 549GH      | GREENVILLE CBOC                | 2017-03          | TX    | 754  | 17   | CBOC   | PBO            |
| 549GJ      | SHERMAN CBOC                   | 2017-03          | TX    | 750  | 17   | CBOC   | NPB            |
| 610        | MARION, IN DIVISION            | 2017-03          | IN    | 469  | 10   | VAMC   | PBH            |
| 583GB      | BLOOMINGTON CBOC               | 2017-04          | IN    | 474  | 10   | CBOC   | PBO            |
| 610GD      | PERU CBOC                      | 2017-04          | IN    | 469  | 10   | CBOC   | PBO            |
| 515GC      | BENTON HARBOR                  | 2017-05          | MI    | 490  | 10   | CBOC   | PBO            |
| 583GC      | MARTINSVILLE CBOC              | 2017-05          | IN    | 461  | 10   | CBOC   | PBO            |
| 583GF      | WAKEMAN VA CLINIC              | 2017-05          | IN    | 461  | 10   | MSCBOC | PBO            |
| 589GR      | JUNCTION CITY CBOC - EKH       | 2017-05          | KS    | 664  | 15   | CBOC   | PBO            |
| 575        | GRAND JUNCTION                 | 2017-06          | CO    | 815  | 19   | VAMC   | PBH            |
| 575GA      | CBOC-MONTROSE                  | 2017-06          | CO    | 814  | 19   | OOS    | PBO            |
| 575QB      | MOAB VA CLINIC                 | 2017-06          | UT    | 845  | 19   | OOS    | NPB            |
| 589GI      | ST. JOSEPH CBOC - EKH          | 2017-06          | MO    | 645  | 15   | CBOC   | PBO            |
| 575GB      | CRAIG TELEHEALTH OUTRCH CLINIC | 2017-07          | CO    | 816  | 19   | OOS    | PBO            |
| 529GB      | LAWRENCE COUNTY                | 2017-08          | PA    | 161  | 4    | CBOC   | PBO            |
| 583GA      | TERRE HAUTE CBOC               | 2017-08          | IN    | 478  | 10   | CBOC   | PBO            |
| 459GC      | KONA CLINIC                    | 2017-09          | HI    | 967  | 21   | CBOC   | PBO            |
| 460GA      | MILLSBORO                      | 2017-10          | DE    | 199  | 4    | CBOC   | PBO            |
| 607GG      | MADISON WEST VA CLINIC         | 2017-10          | WI    | 537  | 12   | CBOC   | PBO            |
| 459GA      | MAUI CLINIC                    | 2017-11          | HI    | 967  | 21   | CBOC   | PBO            |
| 459GE      | GUAM CLINIC                    | 2017-12          | GU    | 969  | 21   | CBOC   | NPB            |
| 529        | BUTLER VAMC                    | 2017-12          | PA    | 160  | 4    | VAMC   | PBH            |
| 676GD      | WISCONSIN RAPIDS SATELLITE     | 2017-12          | WI    | 544  | 12   | MSCBOC | PBO            |
| 541GD      | MANSFIELD                      | 2018-01          | OH    | 449  | 10   | MSCBOC | PBO            |
| 676GA      | WAUSAU SATELLITE               | 2018-01          | WI    | 544  | 12   | CBOC   | PBO            |
| 676GE      | CLARK COUNTY SATELLITE         | 2018-01          | WI    | 544  | 12   | CBOC   | PBO            |

| Station ID | Division Name             | First Treat Mnth | State | ZIP3 | VISN | Type   | Provider based |
|------------|---------------------------|------------------|-------|------|------|--------|----------------|
| 459GB      | HILO CLINIC               | 2018-02          | HI    | 967  | 21   | CBOC   | PBO            |
| 459GF      | AMERICAN SAMOA CLINIC     | 2018-02          | AS    | 967  | 21   | CBOC   | PBO            |
| 459GH      | SAIPAN VA CLINIC          | 2018-02          | MP    | 969  | 21   | OOS    | NPB            |
| 459QB      | MOLOKAI VA CLINIC         | 2018-02          | HI    | 967  | 21   | OOS    | NPB            |
| 607GD      | BARABOO CBOC              | 2018-02          | WI    | 539  | 12   | CBOC   | PBO            |
| 607GE      | BEAVER DAM CBOC           | 2018-02          | WI    | 539  | 12   | CBOC   | PBO            |
| 607GF      | FREESPORT CBOC            | 2018-02          | IL    | 610  | 12   | CBOC   | PBO            |
| 607GC      | JANESVILLE CBOC           | 2018-03          | WI    | 535  | 12   | CBOC   | PBO            |
| 460HE      | VENTNOR                   | 2018-04          | NJ    | 82   | 4    | MSCBOC | NPB            |
| 460HG      | VINELAND                  | 2018-04          | NJ    | 83   | 4    | MSCBOC | PBO            |
| 553GA      | YALE CBOC                 | 2018-04          | MI    | 480  | 10   | CBOC   | PBO            |
| 553GB      | PONTIAC CBOC              | 2018-04          | MI    | 483  | 10   | CBOC   | PBO            |
| 676GC      | LACROSSE SATELLITE        | 2018-05          | WI    | 546  | 12   | CBOC   | PBO            |
| 676        | TOMAH                     | 2018-06          | WI    | 546  | 12   | VAMC   | PBH            |
| 506GC      | JACKSON OUTPATIENT CLINIC | 2019-10          | MI    | 492  | 10   | CBOC   | PBO            |

### Abbreviations

CBOC = Primary Care Community-Based Outpatient Clinic  
 MSCBOC = Multi-Specialty Community Based Outpatient Clinic  
 CLC = Community Living Center located on VAMC Ward/Floor  
 SACL - Stand Alone Community Living Center  
 CMC = Civilian Medical Center  
 DES= Disability Evaluation Service Clinic  
 SADOM = Stand Alone Domiciliary  
 DOM = Domiciliary located on VAMC Ward/Floor  
 HCC= Health Care Center  
 MHR RTP = Mental Health Residential Rehab Treatment Program  
 NPB = Non-Provider-Based Outpatient Facility  
 OOS = Other Outpatient Services Facility  
 PB = Provider-Based/Non-Provider-Based Designation  
 PBH = Provider-Based Hospital  
 PBO = Provider-Based Outpatient Facility  
 PR RTP = Psychosocial Residential Rehab Treatment Program  
 SR RTP = Substance Residential Rehab Treatment Program  
 VAMC = VA Medical Center  
 Sta # = VA Facility Station Number  
 ST = State  
 VN = Veterans Integrated Service Network  
 ZIP 3 = First three digits of ZIP Code

**eTable 2.** Descriptive Table of Variables Used Subsequent Models and Other Demographics of Interest

|                                | Veteran-months with hospital stays (in the previous month) | Veteran-months with VA hospital stays (in the previous month) | Veteran-months with community hospital stays (in the previous month) |
|--------------------------------|------------------------------------------------------------|---------------------------------------------------------------|----------------------------------------------------------------------|
| Veterans, n                    | 43,200                                                     | 30,804                                                        | 17,347                                                               |
| Veteran-months, n (%)          | 91,675 (100.00%)                                           | 62,924 (100.00%)                                              | 28,751 (100.00%)                                                     |
| Age at PC encounter, mean (SD) | 65.34 (13.95)                                              | 65.85 (14.15)                                                 | 64.22 (13.45)                                                        |
| Age [18, 45), n (%)            | 8,249 (9.00%)                                              | 5,520 (8.77%)                                                 | 2,729 (9.49%)                                                        |
| Age [45, 50), n (%)            | 3,140 (3.43%)                                              | 2,111 (3.35%)                                                 | 1,029 (3.58%)                                                        |
| Age [50, 55), n (%)            | 4,707 (5.13%)                                              | 3,255 (5.17%)                                                 | 1,452 (5.05%)                                                        |
| Age [55, 60), n (%)            | 8,600 (9.38%)                                              | 5,800 (9.22%)                                                 | 2,800 (9.74%)                                                        |
| Age [60, 65), n (%)            | 12,668 (13.82%)                                            | 8,265 (13.13%)                                                | 4,403 (15.31%)                                                       |
| Age [65, 70), n (%)            | 17,471 (19.06%)                                            | 11,641 (18.50%)                                               | 5,830 (20.28%)                                                       |
| Age [70, 75), n (%)            | 17,142 (18.70%)                                            | 11,427 (18.16%)                                               | 5,715 (19.88%)                                                       |
| Age [75, 80), n (%)            | 7,401 (8.07%)                                              | 5,344 (8.49%)                                                 | 2,057 (7.15%)                                                        |
| Age [80, 85), n (%)            | 5,211 (5.68%)                                              | 3,951 (6.28%)                                                 | 1,260 (4.38%)                                                        |
| Age [85, 90), n (%)            | 4,230 (4.61%)                                              | 3,321 (5.28%)                                                 | 909 (3.16%)                                                          |
| Age [90, 95), n (%)            | 2,226 (2.43%)                                              | 1,794 (2.85%)                                                 | 432 (1.50%)                                                          |
| Age [95, 120), n (%)           | 630 (0.69%)                                                | 495 (0.79%)                                                   | 135 (0.47%)                                                          |
| Race: Black, n (%)             | 8,611 (9.39)                                               | 5,894 (9.37)                                                  | 2,717 (9.45)                                                         |
| Race: Other, n (%)             | 2,679 (2.92)                                               | 1,064 (1.69)                                                  | 1,615 (5.62)                                                         |
| Race: Missing, n (%)           | 3,316 (3.62)                                               | 1,965 (3.12)                                                  | 1,351 (4.70)                                                         |
| Gender: Women, n (%)           | 5,941 (6.48%)                                              | 3,618 (5.75%)                                                 | 2,323 (8.08%)                                                        |
| Rural, n (%)                   | 35,571 (38.80%)                                            | 23,579 (37.47%)                                               | 11,992 (41.71%)                                                      |
| CHF*, n (%)                    | 24,204 (26.40%)                                            | 16,197 (25.74%)                                               | 8,007 (27.85%)                                                       |
| HTN*, n (%)                    | 67,536 (73.67%)                                            | 46,649 (74.14%)                                               | 20,887 (72.65%)                                                      |
| Diabetes*, n (%)               | 34,452 (37.58%)                                            | 23,583 (37.48%)                                               | 10,869 (37.80%)                                                      |

|                                                                   | Veteran-months with hospital stays (in the previous month) | Veteran-months with VA hospital stays (in the previous month) | Veteran-months with community hospital stays (in the previous month) |
|-------------------------------------------------------------------|------------------------------------------------------------|---------------------------------------------------------------|----------------------------------------------------------------------|
| Tumor*, n (%)                                                     | 14,961 (16.32%)                                            | 10,916 (17.35%)                                               | 4,045 (14.07%)                                                       |
| Lymphoma*, n (%)                                                  | 1,719 (1.88%)                                              | 1,158 (1.84%)                                                 | 561 (1.95%)                                                          |
| Metastatic Cancer*, n (%)                                         | 4,255 (4.64%)                                              | 3,062 (4.87%)                                                 | 1,193 (4.15%)                                                        |
| Dementia*, n (%)                                                  | 8,743 (9.54%)                                              | 6,666 (10.59%)                                                | 2,077 (7.22%)                                                        |
| Psych Diagnosis*, n (%)                                           | 51,585 (56.27%)                                            | 36,490 (57.99%)                                               | 15,095 (52.50%)                                                      |
| Substance Use Disorder*, n (%)                                    | 24,660 (26.90%)                                            | 18,153 (28.85%)                                               | 6,507 (22.63%)                                                       |
| Current Smoker*, n (%)                                            | 39,210 (42.77%)                                            | 29,577 (47.00%)                                               | 9,633 (33.50%)                                                       |
| Unstably Housed or Homeless*, n (%)                               | 16,031 (17.49%)                                            | 12,425 (19.75%)                                               | 3,606 (12.54%)                                                       |
| Elixhauser Score*, mean (SD)                                      | 6.02 (3.29)                                                | 6.16 (3.26)                                                   | 5.72 (3.34)                                                          |
| Active ORH-Funded Social Worker at Veteran's Site, n (%)          | 70,980 (77.43%)                                            | 48,343 (76.83%)                                               | 22,637 (78.73%)                                                      |
| 1+ hospital days in previous 30 days, n (%)                       | 91,675 (100.00%)                                           | 62,924 (100.00%)                                              | 28,751 (100.00%)                                                     |
| 1+ VA hospital days in previous 30 days, n (%)                    | 67,785 (73.94%)                                            | 62,924 (100.00%)                                              | 4,861 (16.91%)                                                       |
| 1+ community hospital days in previous 30 days, n (%)             | 28,751 (31.36%)                                            | 0 (0.00%)                                                     | 28,751 (100.00%)                                                     |
| 1+ PACT SW encounter within 30 days after inpatient hospital stay | 7,127 (26.51%)                                             | 4382 (23.39%)                                                 | 2745 (33.68%)                                                        |
| # of Palliative Care encounters within 30 days, mean (SD)         | 0.09 (1.32)                                                | 0.08 (1.27)                                                   | 0.10 (1.44)                                                          |
| 1+ Palliative Care encounters within 30 days, n (per 1000)        | 1,329 (14.5 per 1000)                                      | 932 (14.8 per 1000)                                           | 397 (13.8 per 1000)                                                  |

\* Occurrence in the 365 days prior to palliative care encounter

Other race includes American Indian or Alaskan Native, Asian, and Native Hawaiian or other Pacific Islander



**eTable 3.** Characteristics of Hospitalized Veterans Before and After Intervention

|                                                    | After Intervention | Before Intervention | Pr/H <sub>0</sub> | SMD   |
|----------------------------------------------------|--------------------|---------------------|-------------------|-------|
| n Veterans                                         | 2,755              | 2,553               |                   |       |
| Age, mean (SD)                                     | 64.65 (14.39)      | 64.78 (14.50)       | 0.738             | 0.009 |
| Race: Black, No. (%)                               | 276 (10.02)        | 247 (9.67)          | 0.709             | 0.012 |
| Race: White, No. (%)                               | 84 (3.05)          | 86 (3.37)           | 0.56              | 0.018 |
| Race: Other, No. (%)                               | 2305 (83.67)       | 2123 (83.16)        | 0.645             | 0.014 |
| Race: Missing, No (%)                              | 90 (3.27)          | 97 (3.80)           | 0.328             | 0.029 |
| Gender: female, No. (%)                            | 186 (6.75)         | 154 (6.03)          | 0.311             | 0.029 |
| Rural, No. (%)                                     | 1064 (38.62)       | 1045 (40.93)        | 0.091             | 0.047 |
| Unstably housed or homeless <sup>a</sup> , No. (%) | 498 (18.08)        | 418 (16.37)         | 0.109             | 0.045 |
| Congestive heart failure <sup>a</sup> , No. (%)    | 731 (26.53)        | 669 (26.20)         | 0.81              | 0.007 |
| Hypertension <sup>a</sup> , No. (%)                | 2018 (73.25)       | 1897 (74.30)        | 0.399             | 0.024 |
| Diabetes <sup>a</sup> , No. (%)                    | 1014 (36.81)       | 983 (38.50)         | 0.212             | 0.035 |
| Tumor <sup>a</sup> , No. (%)                       | 454 (16.48)        | 383 (15.00)         | 0.151             | 0.041 |
| Lymphoma <sup>a</sup> , No. (%)                    | 50 (1.81)          | 46 (1.80)           | 1                 | 0.001 |
| Metastatic cancer <sup>a</sup> , No. (%)           | 122 (4.43)         | 105 (4.11)          | 0.617             | 0.016 |
| Dementia <sup>a</sup> , No. (%)                    | 259 (9.40)         | 251 (9.83)          | 0.628             | 0.015 |
| Psychiatric diagnosis <sup>a</sup> , No. (%)       | 1544 (56.04)       | 1487 (58.25)        | 0.111             | 0.045 |
| Substance use disorder <sup>a</sup> , No. (%)      | 783 (28.42)        | 702 (27.50)         | 0.472             | 0.021 |
| Current smoker <sup>a</sup> , No. (%)              | 1238 (44.94)       | 1091 (42.73)        | 0.112             | 0.044 |
| Elixhauser score, mean (SD)                        | 5.95 (3.21)        | 5.94 (3.20)         | 0.936             | 0.002 |

Notes: “Before” includes the month prior to intervention start at sites, and “After” is the third month after the intervention start.

a. In 12 months prior to index month

b. VA-paid hospital stay at a non-VA provider

SMD=standardized mean difference

**eTable 4.** Sensitivity Analyses: Program Outcome Using Different Estimators

|                                                                                           | Any Hospitalization |         | VA Hospitalization  |         | Community Hospitalization |         |
|-------------------------------------------------------------------------------------------|---------------------|---------|---------------------|---------|---------------------------|---------|
|                                                                                           |                     |         |                     |         |                           |         |
| Change in palliative care per 1000 Veterans associated with intervention [95% conf. int.] |                     |         |                     |         |                           |         |
| Two-way fixed-effects only <sup>a</sup>                                                   | 5.8<br>[2.5, 9.1]   | p<0.001 | 5.8<br>[1.5, 10.1]  | p=0.009 | 6.3<br>[-0.5, 13.1]       | p=0.076 |
| Doubly-robust (simple) <sup>b</sup>                                                       | 13.6<br>[7.3, 20]   | n/a     | 11.8<br>[4.4, 19.2] | n/a     | 9.8<br>[2.9, 16.8]        | n/a     |
| Double-robust (dynamic) <sup>c</sup>                                                      | 10.4<br>[5.5, 15]   | n/a     | 9.5<br>[3.5, 16.5]  | n/a     | 8.0<br>[2.5, 13.6]        | n/a     |

- OLS linear model with year-month and site fixed effects, and no covariates. Standard errors are clustered at the site level.
- Mean effect aggregated across each group and time period, adjusting for covariates in eTable 2.
- Summary of average treatment based on event-study/dynamic aggregation, adjusting for covariates in eTable 2.

**eTable 5.** Effects Grouped by Sites That Started the Staffing Program in the Same Month

| Group Effects:                                      |       |          |            |                          |          |
|-----------------------------------------------------|-------|----------|------------|--------------------------|----------|
| Year-Month                                          | Group | Estimate | Std. Error | [95% Simult. Conf. Band] |          |
| 2016-Nov                                            | 2     | 0.0256   | 0.0188     | -0.0204                  | 0.0717   |
| 2017-Jan                                            | 4     | 0.0043   | 0.0036     | -0.0046                  | 0.0132   |
| 2017-Feb                                            | 5     | 0.0044   | 0.0026     | -0.002                   | 0.0107   |
| 2017-Mar                                            | 6     | 0.0383   | 0.0178     | -0.0052                  | 0.0818   |
| 2017-Apr                                            | 7     | 0.1865   | 0.0493     | 0.0656                   | 0.3075 * |
| 2017-May                                            | 8     | 0.0153   | 0.0102     | -0.0096                  | 0.0402   |
| 2017-Jun                                            | 9     | 0.0226   | 0.0148     | -0.0137                  | 0.0588   |
| 2017-Oct                                            | 13    | 0.0127   | 0.0145     | -0.023                   | 0.0483   |
| 2017-Nov                                            | 14    | 0.0105   | 0.0148     | -0.0257                  | 0.0468   |
| 2017-Dec                                            | 15    | 0.0077   | 0.0055     | -0.0057                  | 0.0211   |
| 2018-Jan                                            | 16    | 0.072    | 0.0787     | -0.1208                  | 0.2649   |
| 2018-Feb                                            | 17    | 0.0243   | 0.0096     | 0.0006                   | 0.0479 * |
| 2018-Mar                                            | 18    | 0.037    | 0.0529     | -0.0926                  | 0.1666   |
| Summary average treatment effect                    |       | 0.0156   | 0.033      | 0.0092                   | 0.022*   |
| Signif. codes: `*' confidence band does not cover 0 |       |          |            |                          |          |
| Control Group: Not Yet Treated, Anticipation        |       |          |            |                          |          |
| Periods: 0                                          |       |          |            |                          |          |
| Estimation Method: Doubly Robust                    |       |          |            |                          |          |

**eTable 6.** Falsification Tests Using Inpatient Consults and Mortality as Outcomes

|                                                          | Cohort                |        |
|----------------------------------------------------------|-----------------------|--------|
| All hospitalizations n=91,675                            | Any Hospitalization   |        |
| Inpatient palliative care consult ordered <sup>a,b</sup> | -1.9<br>[-53.3, 49.7] | p=0.94 |
| 30-day mortality <sup>a</sup>                            | -0.4<br>[-4.5, 3.6]   | p=0.84 |

- a. Adjusted for demographic and clinical characteristics listed in Table 1.
- b. Consults identified from inpatient orders in the health record with associated stop codes of 351 or 353.

**eFigure.** Event Study and Evaluation of Parallel Trends

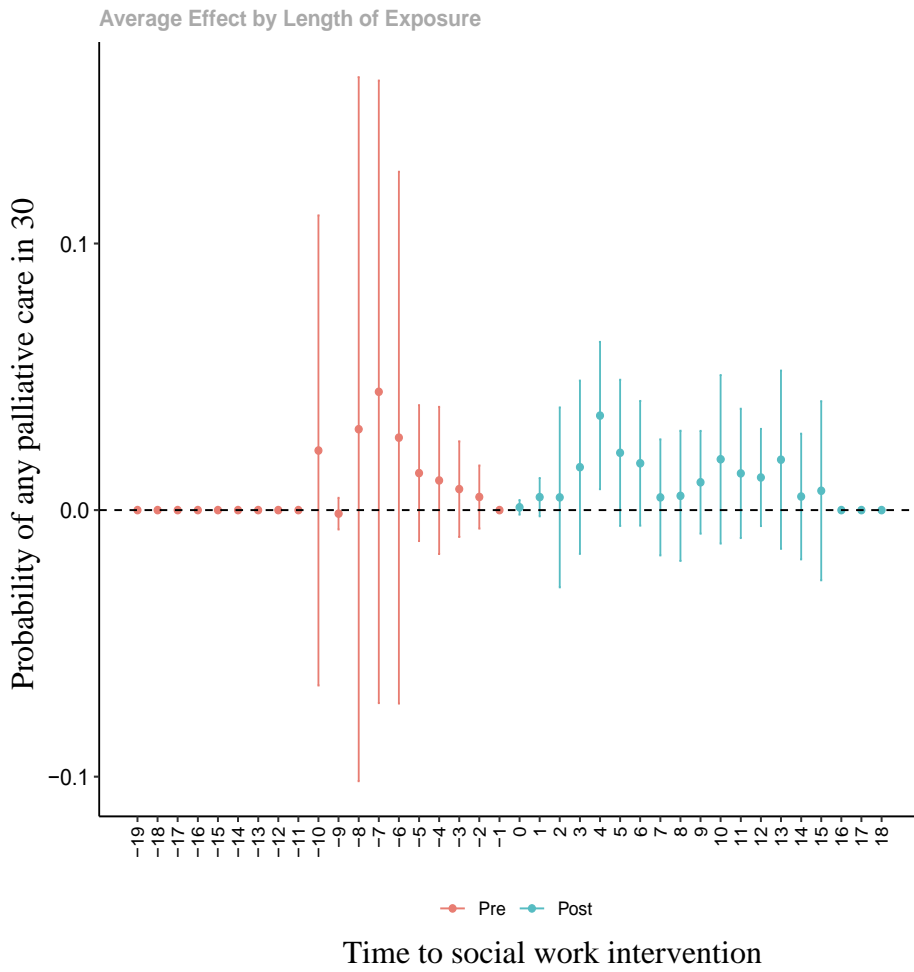

Supplement: jamanetwopen-e2249731-s001.pdf [file jamanetwopen-e2249731-s001.pdf]
