# Supplementary material for: Social Work Staffing and Use of Palliative Care Among Recently Hospitalized Veterans
Source: PubMed Central journal article supplement (PMC9856777; doi:10.1001/jamanetworkopen.2022.49731), 2023-01-04
Supplement: jamanetwopen-e2249731-s002.pdf [file jamanetwopen-e2249731-s002.pdf]

## Data Sharing Statement

Cornell. Social Work Staffing and Use of Palliative Care Among Recently Hospitalized Veterans. *JAMA Netw Open*. Published January 04, 2023.

doi:10.1001/jamanetworkopen.2022.49731

### Data

**Data available:** No

### Additional Information

**Explanation for why data not available:** Data are protected health information from the Veterans Affairs health system, and cannot be made available publicly.
